# Supplementary material
Source: MDPI journal article supplement (https://www.mdpi.com/2071-1050/10/10/3796)
Supplement: s1 [file s1]

## Supplementary Materials

### Effect of three husbandry systems on environmental impact of organic pigs in Europe

Gwendolyn Rudolph <sup>1</sup>, Stefan Hörtenhuber <sup>1,\*</sup>, Davide Bochicchio <sup>2</sup>, Gillian Butler <sup>3</sup>, Roland Brandhofer <sup>1</sup>, Sabine Dippel <sup>4</sup>, Jean Yves Dourmad <sup>5</sup>, Sandra Edwards <sup>3</sup>, Barbara Früh<sup>6</sup>, Matthias Meier <sup>7</sup>, Armelle Prunier <sup>5</sup>, Christoph Winckler <sup>1</sup>, Werner Zollitsch <sup>1</sup> and Christine Leeb <sup>1</sup>

Equation 1: P-losses into water bodies.

$$P_{Losses} \text{ [kg/ha/y]} = \text{Livestock density [kg BM/ha]} * 1,0909 * 10^{-4}$$

with

$P_{Losses}$  = hypothetical P-Losses (kg/ha/y)

BM = body mass (live weight; kg)

**Table S1:** Characteristics of farms (median, minimum, maximum at time of farm visit) per system (IN, POUT, OUT; n=number of farms). Data collected at farm level served as basis for calculation of environmental impacts at production chain level. Production chains either consisted of farrow-to-finish farms or were combined of individual farms covering only parts of the production chain.

|                                   | IN (n=34)                                                       | POUT (n=28)                                                                                                                                 | OUT (n=12)                                       |
|-----------------------------------|-----------------------------------------------------------------|---------------------------------------------------------------------------------------------------------------------------------------------|--------------------------------------------------|
| Farm size (ha)                    | 42 (3 – 360)                                                    | 77 (7 – 500)                                                                                                                                | 59 (11 – 680)                                    |
| Sows (SO) / farm                  | 39 (26-73)                                                      | 141 (52-216)                                                                                                                                | 53 (37-248)                                      |
| Weaners (WE) / farm               | 82 (47-140)                                                     | 250 (80-400)                                                                                                                                | 49 (17-350)                                      |
| Fatteners (FA) / farm             | 141 (82-300)                                                    | 338 (74-720)                                                                                                                                | 154 (51-1166)                                    |
| Slaughtered fatteners [n/1yr]     | 367 (4 – 1827)                                                  | 1700 (0 – 16000)                                                                                                                            | 260 (15 – 11016)                                 |
| Age at weaning [days]             | 42 (39 – 90)                                                    | 49 (39 – 90)                                                                                                                                | 50 (42 – 70)                                     |
| Conventional breed (C)            | 23                                                              | 23                                                                                                                                          | 0                                                |
| Traditional breeds (T)            | 0                                                               | 1                                                                                                                                           | 6                                                |
| Mixed breeds (C and T or crosses) | 11                                                              | 4                                                                                                                                           | 6                                                |
| Countries                         | Germany (13),<br>Austria (12),<br>Switzerland (7),<br>Italy (2) | Denmark (11),<br>France (4),<br>Germany (3),<br>Austria (3),<br>Italy (3),<br>Switzerland (2),<br>Czech Republic (1),<br>United Kingdom (1) | United Kingdom (7),<br>Italy (4),<br>Austria (1) |

**Table S2:** Emission factors for NH<sub>3</sub>, N<sub>2</sub>O, N<sub>2</sub> and NO<sub>3</sub> in outdoor paddocks.

|                                        | NH <sub>3</sub> -N<br>(kg/kg N) | N <sub>2</sub> O-N<br>(kg/kg N) | N <sub>2</sub> -N<br>(kg/kg N) | NO <sub>3</sub> -N<br>(kg/kg N) |
|----------------------------------------|---------------------------------|---------------------------------|--------------------------------|---------------------------------|
| Emission factor [kg/kg tot N excreted] | 0.113                           | 0.001                           | 0.003                          | 0.263                           |

**Table S3:** Emission factors for housing and manure management systems depending on floor type and manure type, litter quality, storage period, spreading according to *Rigolot et al.* [29].

|                                                               | NH <sub>3</sub> -N<br>(kg/kg N) | N <sub>2</sub> O-N<br>(kg/kg N) | N <sub>2</sub> -N<br>(kg/kg N) |
|---------------------------------------------------------------|---------------------------------|---------------------------------|--------------------------------|
| <b>Floor type and manure management</b>                       |                                 |                                 |                                |
| Slatted floor: slurry (removal after each batch)              | 0.242                           | 0.002                           | 0.006                          |
| Solid flooring: solid manure                                  | 0.142                           | 0.002                           | 0.006                          |
| Deep litter depending on litter quality:                      |                                 |                                 |                                |
| - very good                                                   | 0.080                           | 0.012                           | 0.589                          |
| - good                                                        | 0.100                           | 0.024                           | 0.496                          |
| - poor                                                        | 0.220                           | 0.038                           | 0.305                          |
| - very poor                                                   | 0.440                           | 0.008                           | 0.116                          |
| <b>Criteria manure storage* variation factor</b>              |                                 |                                 |                                |
| Solid manure (manure pile)                                    | 0.07                            | 0.01                            | 0.03                           |
| Slurry storage:                                               |                                 |                                 |                                |
| - covered                                                     | 0.05                            | 0.001                           | -                              |
| - uncovered- storage period <180 days                         | 0.05                            | 0.001                           | -                              |
| - uncovered- storage period > 180 days                        | 0.10                            | 0.001                           | -                              |
| - uncovered- storage period 180-365 days                      | 0.15                            | 0.001                           | -                              |
| <b>Manure spreading</b>                                       |                                 |                                 |                                |
| Solid manure and compost [kg/kg applied manure]               | 0.05                            | 0.0010                          | 0.05                           |
| Slurry spreading – broadcast spreading [kg/kg applied slurry] | 0.20                            | 0.0024                          | 0.05                           |
| Slurry spreading – injection [kg/kg applied slurry]           | 0.08                            | 0.00126                         | 0.05                           |

**Table S4:** Characteristics of the animal production stages by system.

|                                                                  | System | n <sup>1</sup> | Min. | Q25% | Mean | Median | Q75% | Max. |
|------------------------------------------------------------------|--------|----------------|------|------|------|--------|------|------|
| <b>Sows</b>                                                      |        |                |      |      |      |        |      |      |
| piglets born per litter (life born + still born)                 | IN     | 21             | 11.2 | 12.0 | 13.1 | 13.3   | 14.0 | 14.8 |
|                                                                  | POUT   | 28             | 6.0  | 12.0 | 12.7 | 13.5   | 14.0 | 16.5 |
| [n, 1yr mean] <sup>2</sup>                                       | OUT    | 10             | 6.0  | 7.0  | 9.2  | 8.80   | 12.0 | 12.5 |
| piglets weaned per sow per year [n, 1yr mean] <sup>2</sup>       | IN     | 23             | 13.0 | 16.6 | 18.8 | 19.4   | 21.0 | 23.8 |
|                                                                  | POUT   | 30             | 5.0  | 16.2 | 18.4 | 19.4   | 20.9 | 25.0 |
|                                                                  | OUT    | 10             | 7.5  | 10.0 | 14.3 | 13.5   | 18.6 | 22.8 |
| sow replacement rate [%, 1yr mean] <sup>2</sup>                  | IN     | 23             | 12.0 | 20.0 | 28.4 | 30.0   | 32.0 | 53.0 |
|                                                                  | POUT   | 30             | 0.0  | 25.0 | 34.6 | 30.5   | 43.0 | 87.0 |
|                                                                  | OUT    | 10             | 3.0  | 10.0 | 19.0 | 17.0   | 35.0 | 35.0 |
| age at culling [n farrowings] <sup>1</sup>                       | IN     | 20             | 4.0  | 5.0  | 5.6  | 6.0    | 6.5  | 7.0  |
|                                                                  | POUT   | 28             | 2.0  | 4.0  | 5.4  | 5.0    | 8.0  | 10.0 |
|                                                                  | OUT    | 7              | 2.0  | 2.0  | 5.6  | 7.0    | 8.0  | 8.0  |
| live weight at culling [kg at culling] <sup>2</sup>              | IN     | 23             | 197  | 227  | 238  | 233    | 253  | 275  |
|                                                                  | POUT   | 30             | 187  | 200  | 245  | 240    | 277  | 325  |
|                                                                  | OUT    | 10             | 173  | 193  | 220  | 204    | 250  | 300  |
| <b>Weaners</b>                                                   |        |                |      |      |      |        |      |      |
| weight at weaning [kg, 1yr mean] <sup>2</sup>                    | IN     | 23             | 6.0  | 10.0 | 10.5 | 10.0   | 11.5 | 15.0 |
|                                                                  | POUT   | 30             | 5.5  | 10.0 | 12.9 | 13.5   | 13.5 | 28.0 |
|                                                                  | OUT    | 10             | 5.5  | 10.0 | 14.0 | 15.0   | 18.0 | 20.0 |
| weight at end of post-weaning period [kg, 1yr mean] <sup>2</sup> | IN     | 23             | 24.0 | 25.0 | 28.7 | 28.0   | 30.0 | 42.0 |
|                                                                  | POUT   | 30             | 23.0 | 30.0 | 30.4 | 30.0   | 32.5 | 40.0 |
|                                                                  | OUT    | 10             | 25.0 | 30.0 | 32.0 | 32.5   | 35.0 | 35.0 |
| mortality rate weaners [%, 1yr mean] <sup>2</sup>                | IN     | 23             | 0.0  | 1.0  | 4.9  | 3.0    | 5.0  | 20.0 |
|                                                                  | POUT   | 30             | 0.0  | 3.0  | 4.5  | 5.0    | 5.0  | 20.0 |
|                                                                  | OUT    | 10             | 0.0  | 0.0  | 2.7  | 2.0    | 4.0  | 10.0 |
| <b>Fattening pigs</b>                                            |        |                |      |      |      |        |      |      |
| live weight at slaughter [kg, 1yr mean] <sup>2</sup>             | IN     | 23             | 110  | 122  | 130  | 131    | 140  | 147  |
|                                                                  | POUT   | 10             | 86   | 113  | 125  | 117    | 127  | 187  |
|                                                                  | OUT    | 29             | 87   | 105  | 137  | 124    | 187  | 200  |
| Mortality rate fattening pigs [%, 1yr mean] <sup>2</sup>         | IN     | 23             | 0.0  | 1.0  | 1.3  | 1.0    | 2.0  | 4.0  |
|                                                                  | POUT   | 10             | 0.0  | 2.0  | 2.4  | 2.0    | 4.0  | 6.0  |
|                                                                  | OUT    | 29             | 0.0  | 0.0  | 1.8  | 0.5    | 5.0  | 5.0  |

<sup>1</sup> Number of observations differs from number of production chains/systems, as not each parameter was available for all farms; <sup>2</sup> Numbers of observations differ from number of production chains/systems due to 3 farms calculated with means for the environmental impact of the missing animal production stage at farm level (2 production chains calculated with average environmental impact for piglet production; 1 production chain calculated with average environmental impact of the fattening stage).

**Table S5:** Characteristics of dietary nutrient content and feed consumption by system. The values reflect an average dietary content over all diets fed to the animal group. FCR=Feed conversion rate, n=Number of production chains.

| Parameter                                           | System | n  | Min. | Q25% | Median | Q75% | Max. |
|-----------------------------------------------------|--------|----|------|------|--------|------|------|
| <b>Pregnant and lactating sows</b>                  |        |    |      |      |        |      |      |
| Feed per sow<br>[kg/year]                           | IN     | 23 | 923  | 1059 | 1277   | 1419 | 1733 |
|                                                     | POUT   | 30 | 675  | 1440 | 1680   | 1946 | 2236 |
|                                                     | OUT    | 10 | 827  | 1379 | 1468   | 1604 | 1825 |
| ME MJ/kg                                            | IN     | 23 | 11.8 | 12.3 | 12.5   | 13.0 | 13.1 |
|                                                     | POUT   | 30 | 10.6 | 12.5 | 12.7   | 12.9 | 13.7 |
|                                                     | OUT    | 10 | 9.6  | 9.6  | 12.9   | 13.3 | 14.7 |
| CP [g/kg]                                           | IN     | 23 | 124  | 148  | 153    | 162  | 185  |
|                                                     | POUT   | 30 | 124  | 142  | 151    | 160  | 171  |
|                                                     | OUT    | 10 | 112  | 123  | 154    | 164  | 165  |
| total P [g/kg]                                      | IN     | 23 | 4.0  | 5.1  | 5.5    | 6.0  | 6.6  |
|                                                     | POUT   | 30 | 3.3  | 4.5  | 5.5    | 5.9  | 7.8  |
|                                                     | OUT    | 10 | 0.8  | 3.0  | 3.3    | 4.6  | 6.1  |
| <b>Weaners</b>                                      |        |    |      |      |        |      |      |
| Feed per weaner<br>produced<br>[kg/weaner]          | IN     | 23 | 18   | 28   | 39     | 45   | 60   |
|                                                     | POUT   | 30 | 12   | 33   | 39     | 45   | 99   |
|                                                     | OUT    | 10 | 21   | 34   | 50     | 70   | 111  |
| ME MJ/kg                                            | IN     | 23 | 12.0 | 12.6 | 12.8   | 13.2 | 13.5 |
|                                                     | POUT   | 30 | 12.0 | 12.8 | 13.1   | 13.3 | 13.5 |
|                                                     | OUT    | 10 | 9.5  | 9.5  | 12.8   | 13.4 | 14.7 |
| CP [g/kg]                                           | IN     | 23 | 138  | 171  | 180    | 184  | 207  |
|                                                     | POUT   | 30 | 130  | 173  | 185    | 190  | 208  |
|                                                     | OUT    | 10 | 112  | 144  | 158    | 198  | 198  |
| total P [g/kg]                                      | IN     | 23 | 3.7  | 5.0  | 5.8    | 6.0  | 6.9  |
|                                                     | POUT   | 30 | 3.4  | 4.7  | 5.8    | 6.2  | 8.9  |
|                                                     | OUT    | 10 | 0.8  | 3.5  | 3.5    | 5.4  | 6.4  |
| <b>Fattening pig</b>                                |        |    |      |      |        |      |      |
| Feed per fattening<br>pig produced<br>[kg/fattener] | IN     | 23 | 220  | 259  | 331    | 387  | 494  |
|                                                     | POUT   | 29 | 158  | 251  | 300    | 364  | 1132 |
|                                                     | OUT    | 10 | 209  | 217  | 393    | 871  | 986  |
| Fattening pig FCR<br>[kg/kg pig]                    | IN     | 23 | 2.4  | 2.9  | 3.3    | 3.8  | 4.4  |
|                                                     | POUT   | 29 | 2.7  | 3.0  | 3.2    | 3.7  | 7.0  |
|                                                     | OUT    | 10 | 2.8  | 2.9  | 4.9    | 6.5  | 7.5  |
| ME MJ/kg                                            | IN     | 23 | 12.0 | 12.5 | 12.7   | 13.0 | 14.8 |
|                                                     | POUT   | 29 | 12.0 | 12.8 | 12.9   | 13.0 | 13.4 |
|                                                     | OUT    | 10 | 9.5  | 9.5  | 13.0   | 13.5 | 14.7 |
| CP [g/kg]                                           | IN     | 23 | 118  | 154  | 159    | 170  | 190  |
|                                                     | POUT   | 29 | 130  | 144  | 168    | 177  | 202  |
|                                                     | OUT    | 10 | 112  | 114  | 151    | 170  | 186  |
| total P [g/kg]                                      | IN     | 23 | 3.3  | 4.40 | 5.0    | 5.5  | 6.4  |
|                                                     | POUT   | 29 | 3.4  | 3.7  | 4.9    | 5.5  | 6.4  |
|                                                     | OUT    | 10 | 0.8  | 2.4  | 3.2    | 3.7  | 6.4  |

**Table 1:** Percentages of floor type for lactating and pregnant sows, weaners and fattening pigs kept in the systems indoor (IN) and partly outdoor (POUT).

| Animal category | System | n <sup>2</sup> | Floor type <sup>1</sup> |     |        |        |        |            | Out-door (all-year) | Partly out-doors |
|-----------------|--------|----------------|-------------------------|-----|--------|--------|--------|------------|---------------------|------------------|
|                 |        |                | CB                      | DL  | CB, DL | DL, PS | CB, PS | CB, DL, PS |                     |                  |
| Lactating sows  | IN     | 22             | 59%                     | --- | 5%     | ---    | 32%    | 5%         | ---                 | ---              |
|                 | POUT   | 29             | 7%                      | --- | ---    | ---    | 7%     | ---        | 83%                 | 4%               |
| Pregnant sows   | IN     | 22             | 55%                     | --- | 14%    | ---    | 32%    | ---        | ---                 | ---              |
|                 | POUT   | 29             | 14%                     | --- | ---    | ---    | 4%     | ---        | 45%                 | 38%              |
| Weaner          | IN     | 22             | 50%                     | --- | 5%     | ---    | 41%    | 5%         | ---                 | ---              |
|                 | POUT   | 29             | ---                     | 4%  | 21%    | ---    | 14%    | 10%        | 28%                 | 24%              |
| Fattener        | IN     | 22             | 55%                     | --- | 5%     | ---    | 32%    | 9%         | ---                 | ---              |
|                 | POUT   | 29             | 24%                     | 14% | ---    | ---    | 10%    | 28%        | 14%                 | 10%              |

<sup>1</sup> CB=Concrete with bedding; DL=Deep litter; PS=Partly slatted floor; <sup>2</sup> Excluding three PCs with missing data.

**Table S7:** Type and frequency of manure treatment by system.

| Manure type | System | n  | Frequency of different slurry treatments |            |         |           |
|-------------|--------|----|------------------------------------------|------------|---------|-----------|
|             |        |    | None                                     | Composting | Aerobic | Anaerobic |
| Slurry      | IN     | 24 | 20                                       | ---        | 4       | ---       |
|             | POUT   | 30 | 21                                       | 2          | 5       | 2         |
|             |        |    | Frequency of composting of solid manure  |            |         |           |
|             |        |    | None                                     | Composting |         |           |
| Solid       | IN     | 24 | 19                                       | 5          |         |           |
|             | POUT   | 30 | 26                                       | 4          |         |           |

**Table S8:** Cluster characteristics regarding number of sows on PC at farm visit, average number of slaughtered fattening pigs/year and number of livestock units (LSU).

| Parameter                     | Cluster impact category [cluster number] | n <sup>1</sup> | Min. | Q25% | Mean | Median | Q75% | Max.  |
|-------------------------------|------------------------------------------|----------------|------|------|------|--------|------|-------|
| n sows                        | low [2]                                  | 19             | 12   | 50   | 158  | 80     | 180  | 650   |
| [present at visit]            | intermediate [1/4]                       | 21             | 8    | 35   | 203  | 110    | 222  | 1300  |
|                               | high [3]                                 | 14             | 15   | 20   | 77   | 28     | 160  | 249   |
| LSU [n present at visit]      | low [2]                                  | 19             | 14   | 44   | 167  | 118    | 138  | 795   |
|                               | intermediate [1/4]                       | 21             | 11   | 43   | 187  | 121    | 192  | 1158  |
|                               | high [3]                                 | 14             | 13   | 18   | 57   | 38     | 106  | 184   |
| slaughtered fatteners [n/1yr] | low [2]                                  | 18             | 65   | 417  | 1936 | 659    | 1827 | 11016 |
|                               | intermediate [1/4]                       | 20             | 15   | 317  | 2633 | 859    | 3199 | 16000 |
|                               | high [3]                                 | 14             | 14   | 261  | 598  | 324    | 687  | 3100  |

<sup>1</sup>Number of observations differs from number of production chains/systems, as not each parameter was available for all production chains.
